# Supplementary material for: Red blood cell metabolism under prolonged anaerobic storage
Source: Royal Society of Chemistry journal article supplement (doi:10.1039/c3mb25575a), 2013-02-04
Supplement: c3mb25575a.pdf [file c3mb25575a.pdf]

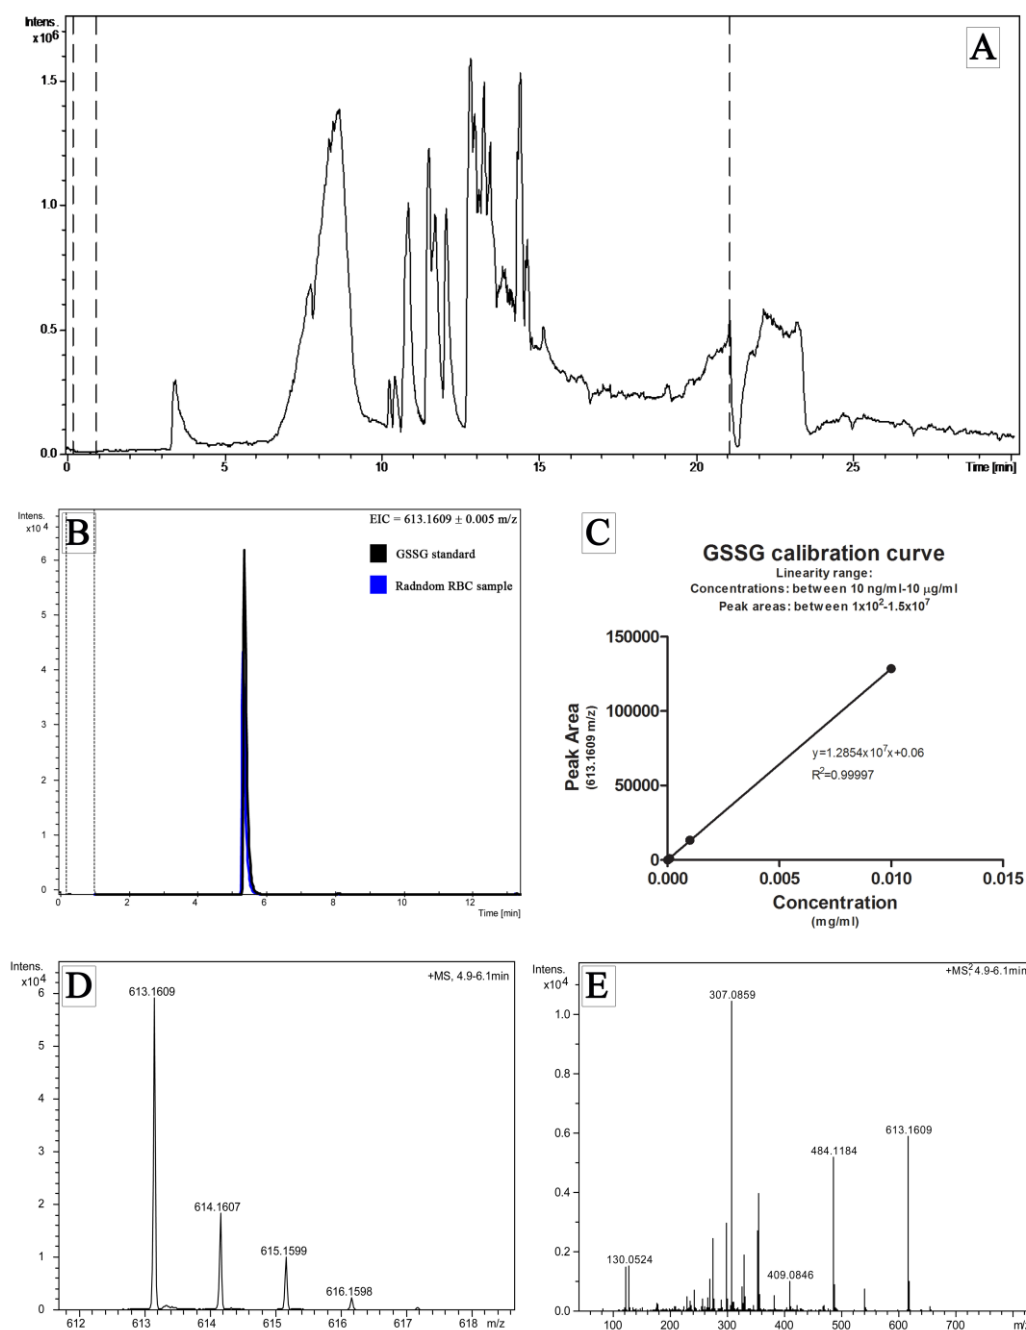

**Supplementary Figure 1** In A, A representative total ion current (TIC) mass spectrum chromatogram of a red blood cell sample. In B, a detail of the extract ion current (EIC) mass spectrum chromatogram for oxidized glutathione (GSSG) of a standard (black spectrum) and random red blood cell sample (blue chromatogram). In C, D and E, , the calibration curve to determine the linearity range, the intact accurate mass isotopic pattern and the fragmentation pattern for a sample metabolite (GSSG), respectively.

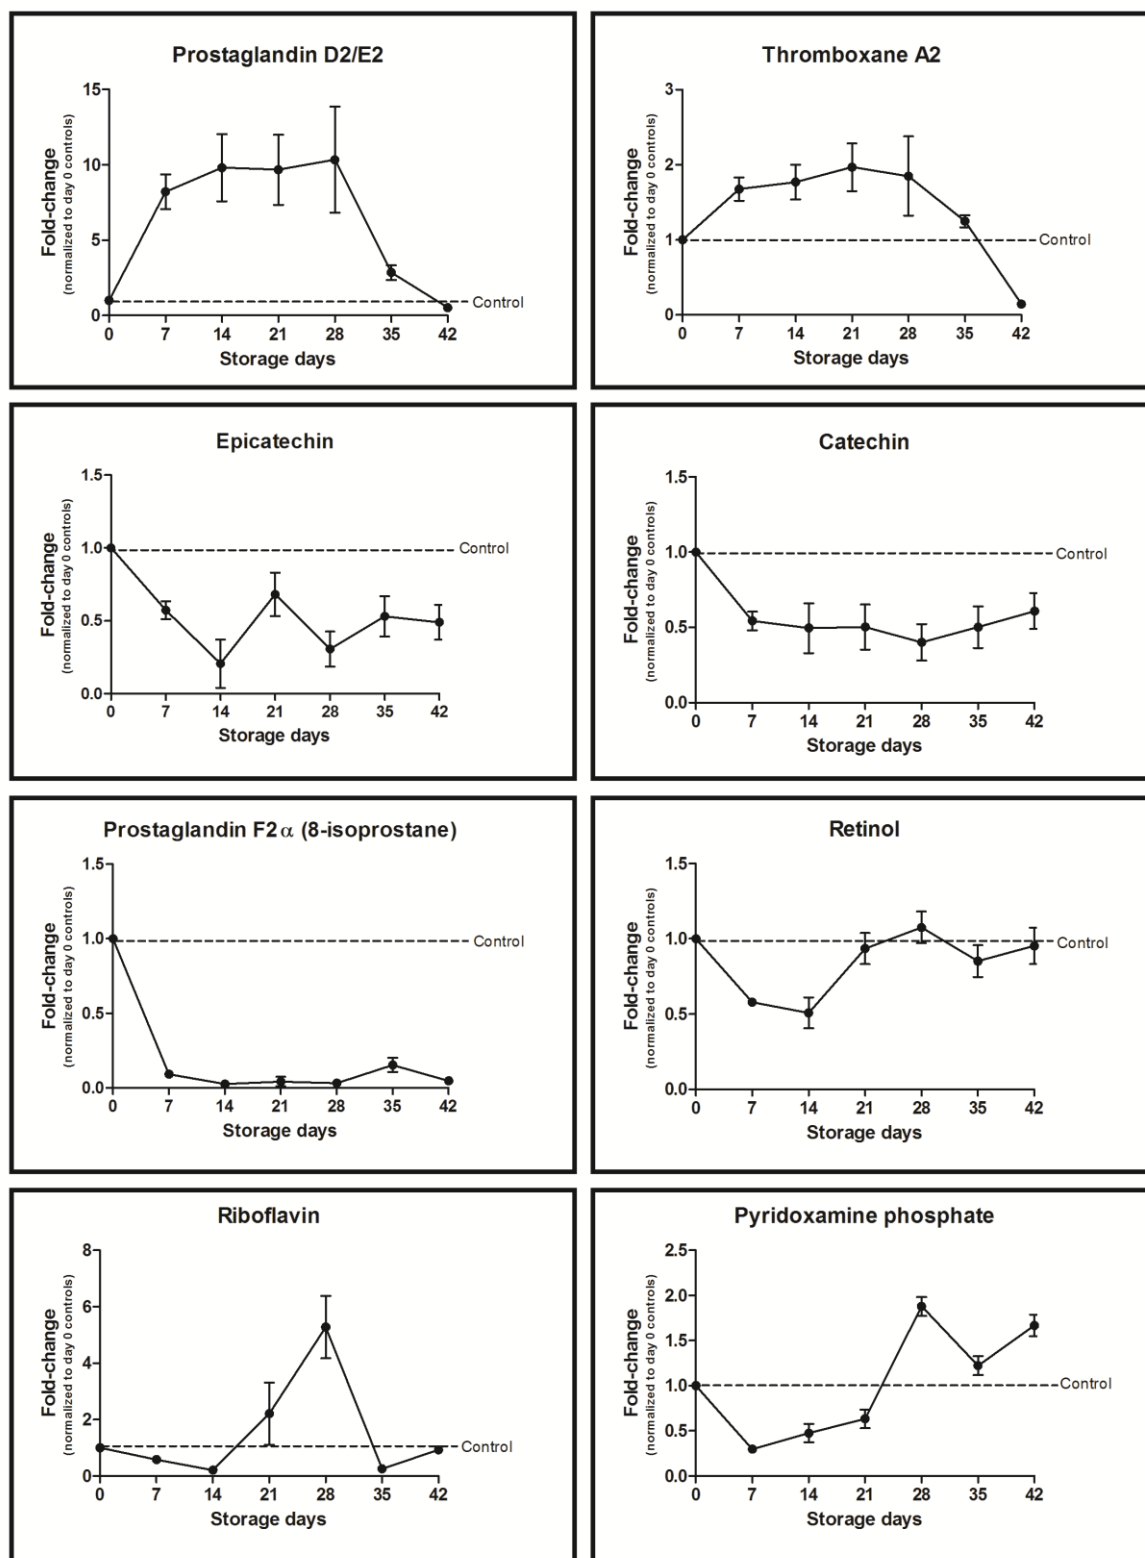

**Supplementary Figure 2** Inflammation/oxidative stress markers (prostaglandins and thromboxane), exogenous anti-oxidant metabolites (epicatechin and catechin) and vitamins/vitamin related metabolites in anaerobically stored RBCs. Results are plotted as fold-change variations upon normalization to day 0 controls.
